# Supplementary material for: Ozone-initiated degradation of 1,2-dichlorobenzene over ceria-supported manganese, nickel, vanadium and iron catalysts
Source: publisher site journal article supplement (doi:10.1515/pac-2023-1019), 2024-03-01
Supplement: Supplementary file 1 [file j_pac-2023-1019_suppl_001.docx]

**Ozone-initiated degradation of 1,2-dichlorobenzene over ceria-supported manganese, nickel, vanadium and iron catalysts**

**Nomthandazo Mkhize a and Viswandha Srirama Rajasekhar Pullabhotla a***

**a** Department of Chemistry, Faculty of Science, Agriculture and Engineering, University of Zululand, P/Bag X1001, KwaDlangezwa 3886, South Africa.


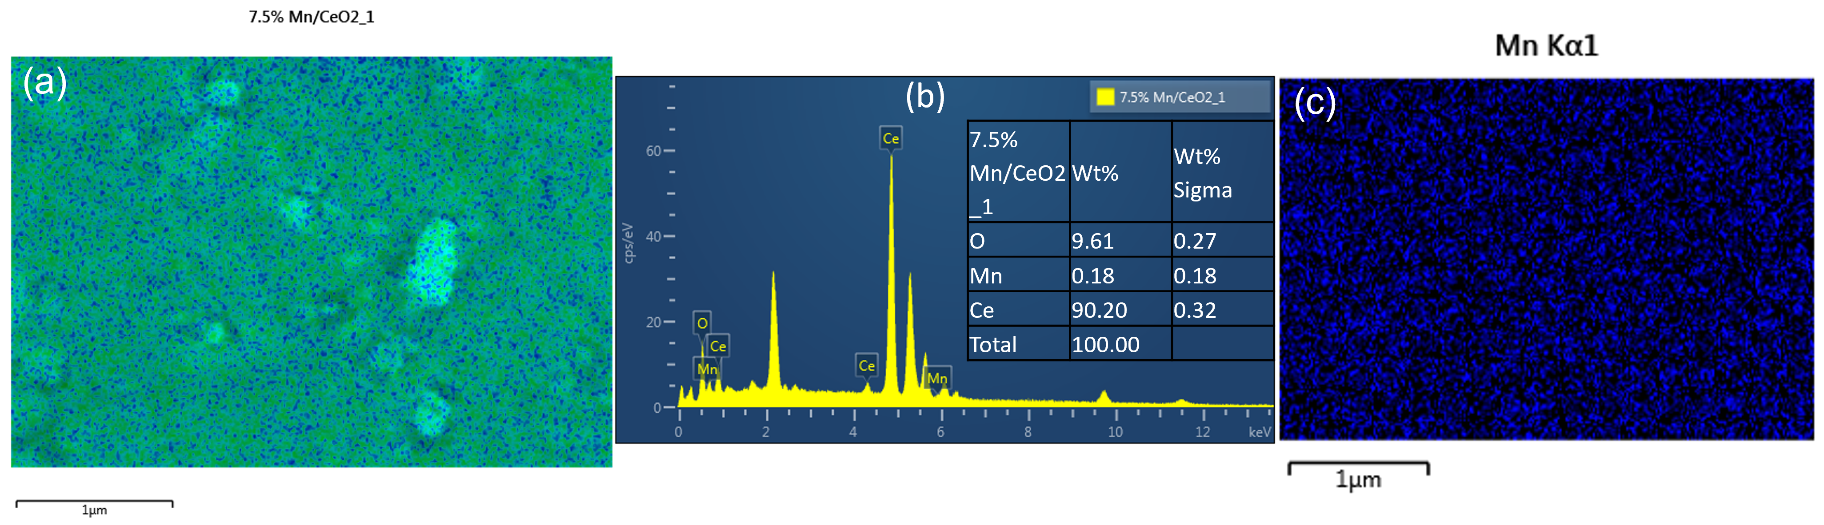

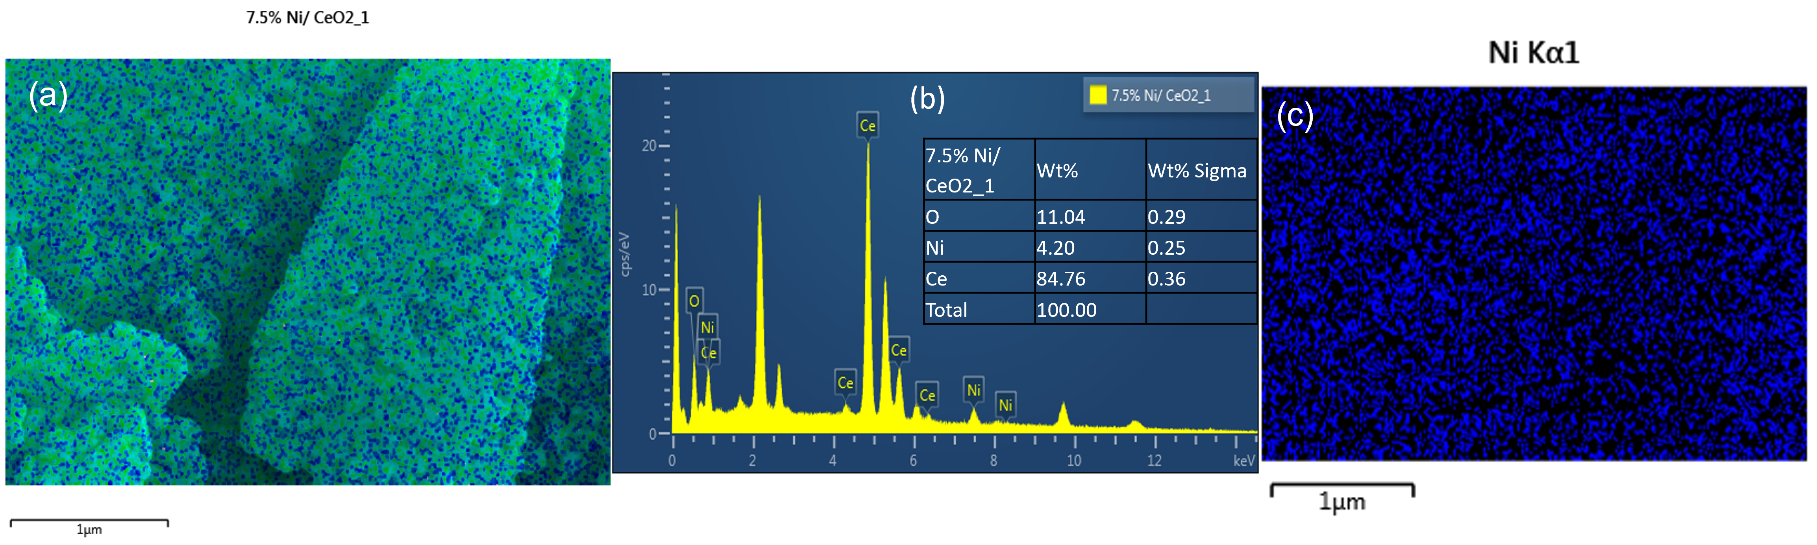
**Figure S1.** EDX results showing (a) elemental mapping, (b) EDX elemental spectrum, and (c) point mapping of 7.5% Mn/CeO2 catalyst.


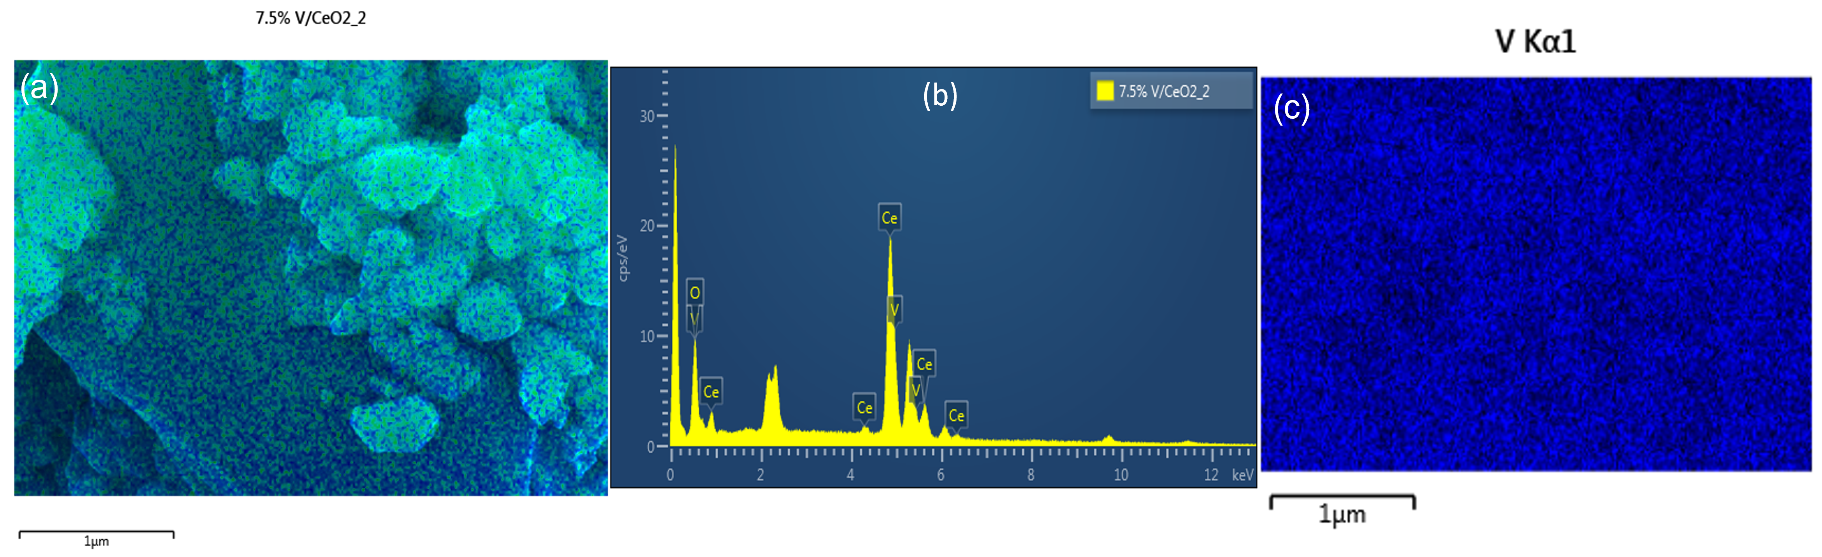
**Figure S2.** EDX results showing (a) elemental mapping, (b) EDX elemental spectrum, and (c) point mapping of 7.5% Ni/CeO2 catalyst.

**Figure S3.** EDX results showing (a) elemental mapping, (b) EDX elemental spectrum, and (c) point mapping of 7.5% V/CeO2 catalyst.


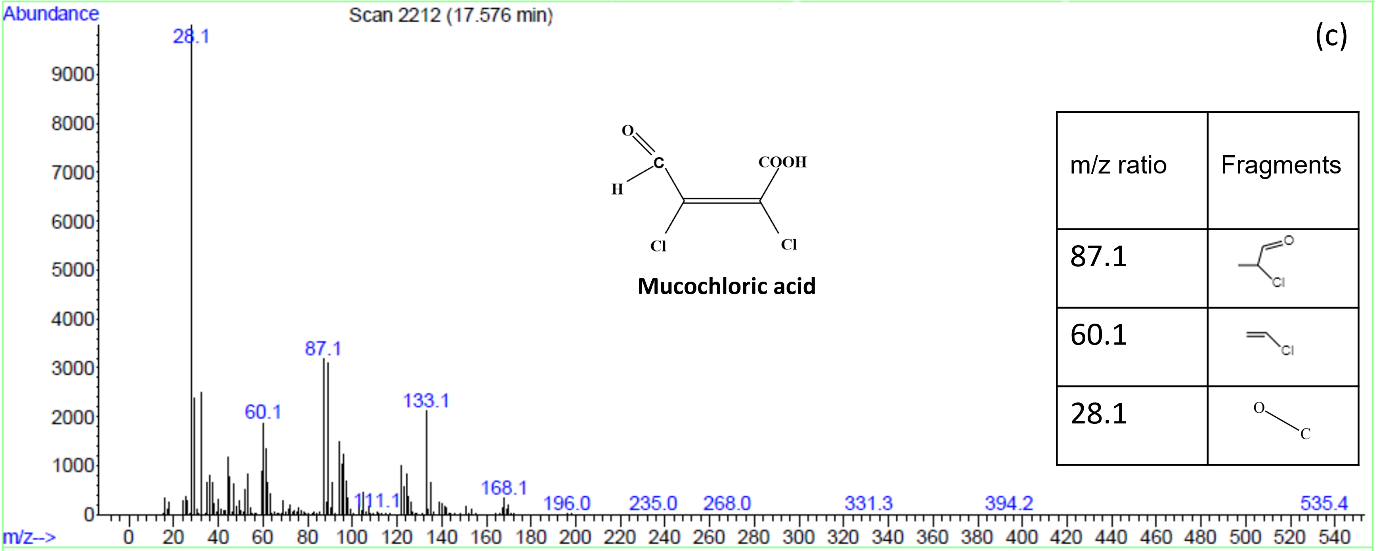

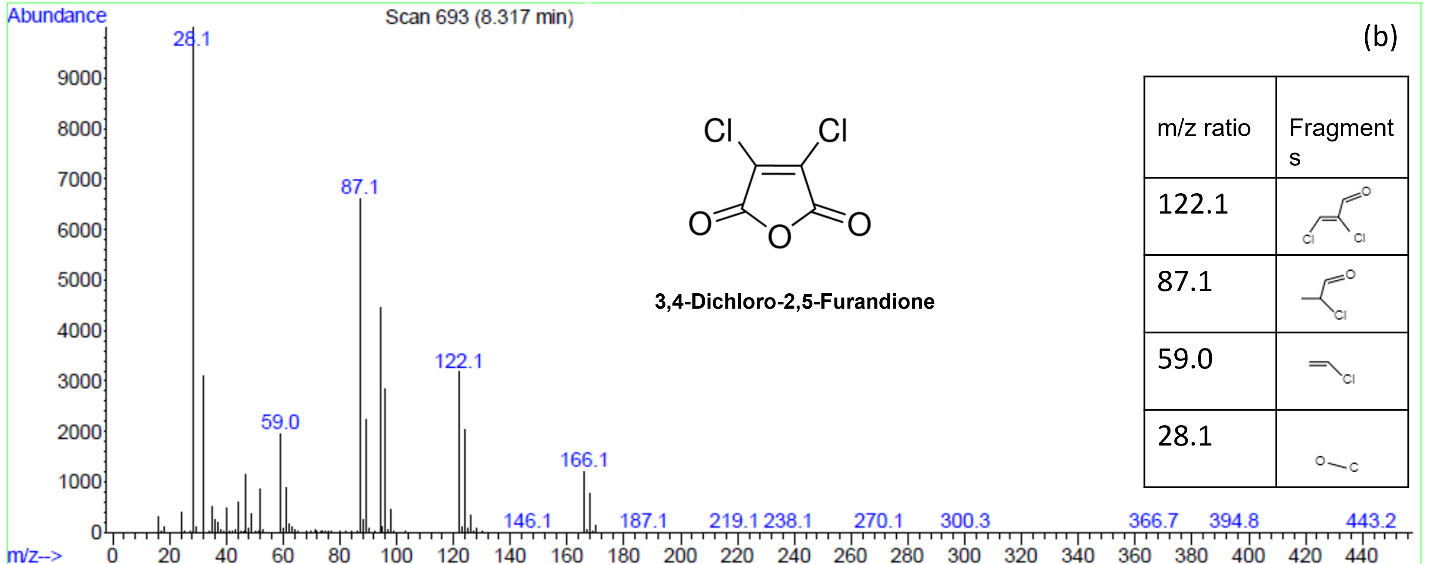

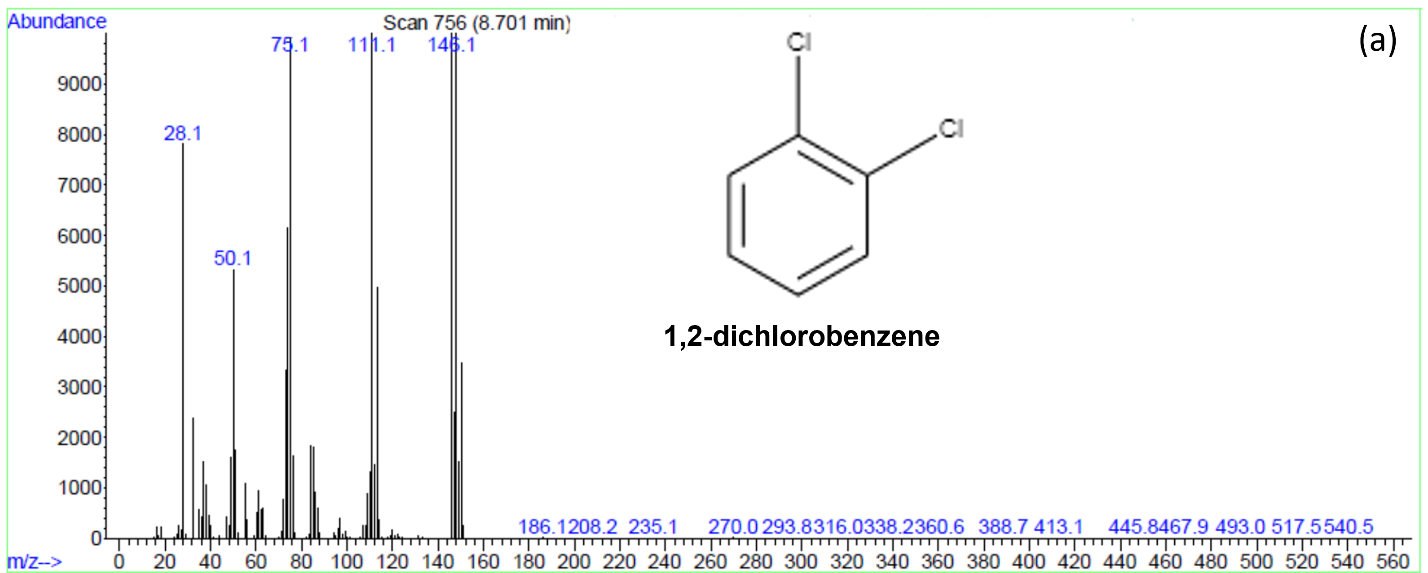
**Figure S4.** Mass spectra of (a) 1,2-dichlorobenzene (b) 3,4-dichloro-2,5-furadione and (c) Mucochloric acid.

**Table S1.** Summary of percentage conversion and selectivity in 2.5% Fe/CeO2 catalyzed ozonation reaction of 1,2-dichlorobenzene.

| Ozonation time (h) | Conversion (%) |  | Selectivity (%) |  |
| --- | --- | --- | --- | --- |
| **Mucochloric acid** | **3,4-dichloro-2,5-furandione** | **Unidentified products** |
| 3 | **2** | **55** | **45** | **-** |
| 6 | **6** | **61** | **39** | **-** |
| 9 | **11** | **62** | **23** | **15** |
| 12 | **14** | **65** | **19** | **16** |
| 15 | **29** | **67** | **25** | **8** |
| 18 | **47** | **75** | **23** | **2** |
| 24 | **62** | **87** | **-** | **13** |

**Table S2.** Summary of percentage conversion and selectivity in 5% Mn/CeO2 catalyzed ozonation reaction of 1,2-dichlorobenzene.

| Ozonation time (h) | Conversion (%) |  | Selectivity (%) |  |
| --- | --- | --- | --- | --- |
| **Mucochloric acid** | **3,4-dichloro-2,5-furandione** | **Unidentified products** |
| 3 | **2** | **30** | **60** | **-** |
| 6 | **5** | **45** | **55** | **-** |
| 9 | **13** | **47** | **50** | **3** |
| 12 | **15** | **51** | **39** | **10** |
| 15 | **32** | **68** | **26** | **6** |
| 18 | **45** | **84** | **10** | **6** |
| 24 | **53** | **90** | **-** | **10** |

**Table S3.** Summary of percentage conversion and selectivity in 7.5% Mn/CeO2 catalyzed ozonation reaction of 1,2-dichlorobenzene.

| Ozonation time (h) | Conversion (%) |  | Selectivity (%) |  |
| --- | --- | --- | --- | --- |
| **Mucochloric acid** | **3,4-dichloro-2,5-furandione** | **Unidentified products** |
| 3 | **3** | **54** | **33** | **13** |
| 6 | **4** | **57** | **35** | **8** |
| 9 | **9** | **53** | **39** | **8** |
| 12 | **11** | **54** | **41** | **5** |
| 15 | **27** | **46** | **38** | **16** |
| 18 | **36** | **56** | **33** | **11** |
| 24 | **55** | **98** | **-** | **2** |

**Table S4.** Summary of percentage conversion and selectivity in 7.5% Ni/CeO2 catalyzed ozonation reaction of 1,2-dichlorobenzene.

| Ozonation time (h) | Conversion (%) |  | Selectivity (%) |  |
| --- | --- | --- | --- | --- |
| **Mucochloric acid** | **3,4-dichloro-2,5-furandione** | **Unidentified products** |
| 3 | **8** | **35** | **22** | **43** |
| 6 | **11** | **39** | **21** | **40** |
| 9 | **13** | **41** | **23** | **36** |
| 12 | **19** | **57** | **25** | **18** |
| 15 | **27** | **48** | **27** | **25** |
| 18 | **34** | **71** | **25** | **4** |
| 24 | **51** | **85** | **10** | **5** |

**Table S5.** Summary of percentage conversion and selectivity in 7.5% V/CeO2­ catalyzed ozonation reaction of 1,2-dichlorobenzene.

| Ozonation time (h) | Conversion (%) |  | Selectivity (%) |  |
| --- | --- | --- | --- | --- |
| **Mucochloric acid** | **3,4-dichloro-2,5-furandione** | **Unidentified products** |
| 3 | **2** | **40** | **45** | **15** |
| 6 | **15** | **41** | **39** | **22** |
| 9 | **18** | **42** | **37** | **21** |
| 12 | **23** | **56** | **34** | **10** |
| 15 | **48** | **61** | **25** | **14** |
| 18 | **54** | **96** | **-** | **4** |
| 24 | **62** | **100** | **-** | **-** |
